# Supplementary material
Source: PubMed Central journal article supplement (PMC7195853)

# 8A1/11E7

## IbAr10200

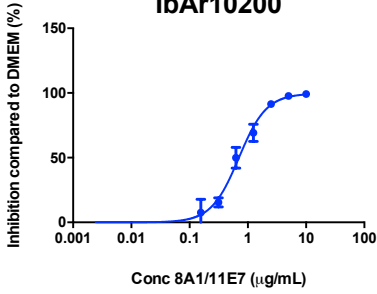

## Sudan Al-Fulah

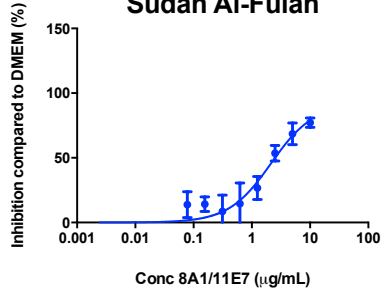

## Turkey

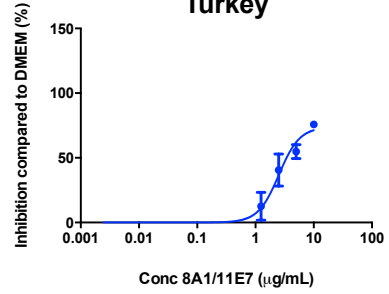

## Hoti

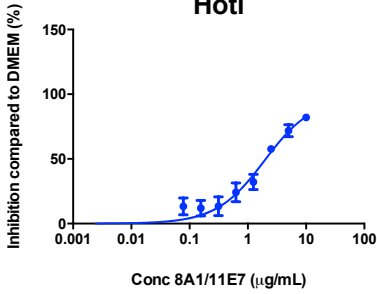

## Oman

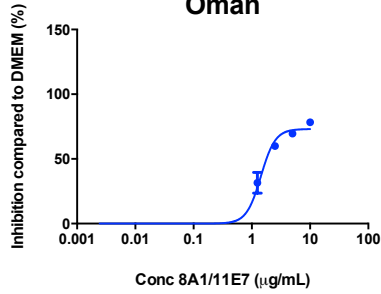

## SPU18/88

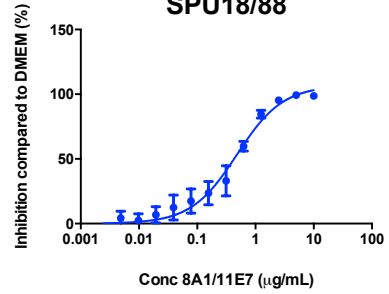

## ArD15786

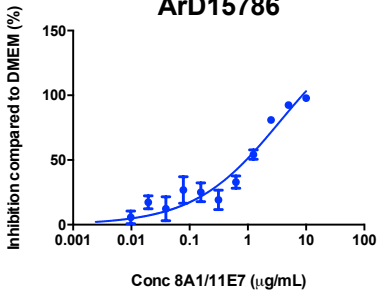

## YL04057

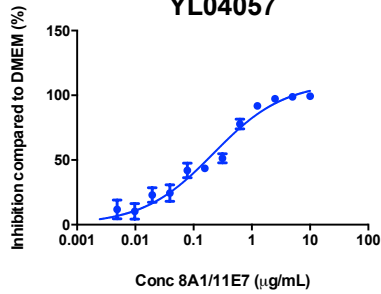

## Afg09

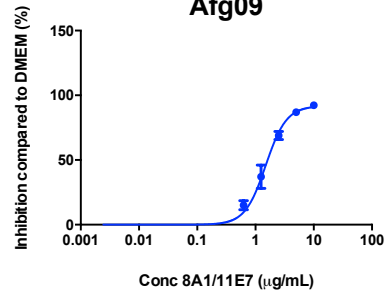

## NIV112143

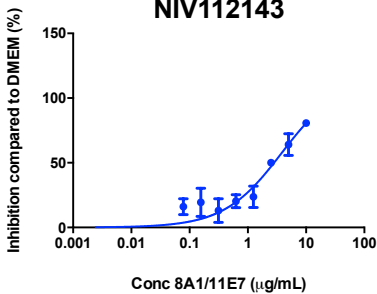

## Baghdad-12

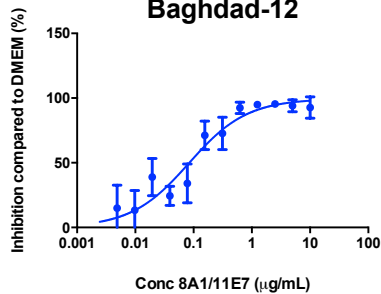

# 8A1/30F7

## IbAr10200

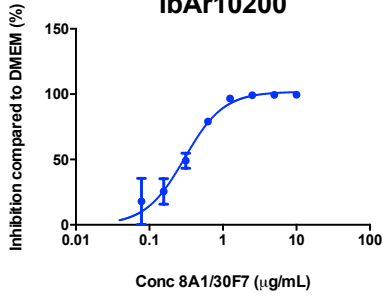

## Sudan AI-Fulah

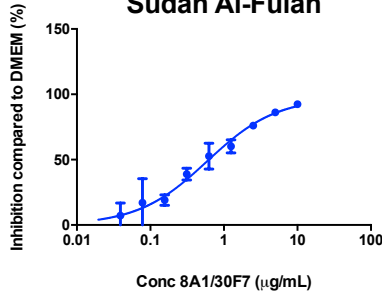

## Turkey

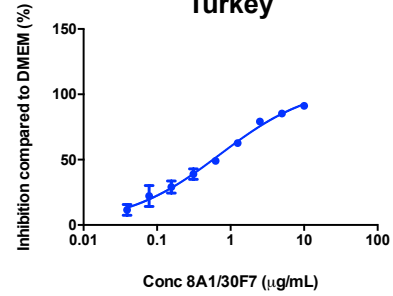

## Hoti

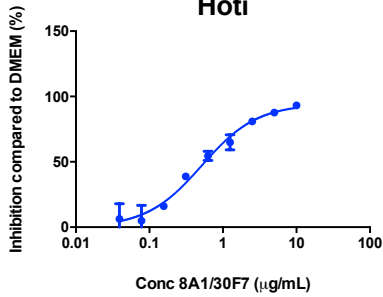

## Oman

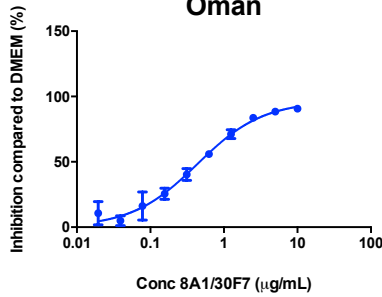

## SPU18/88

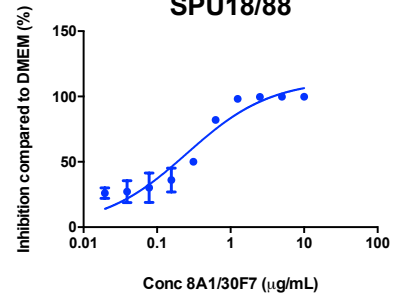

## ArD15786

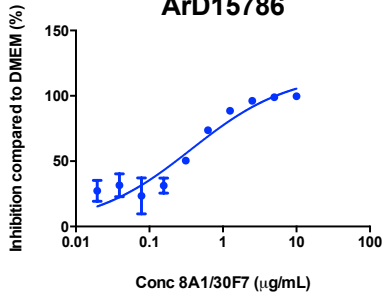

## YL04057

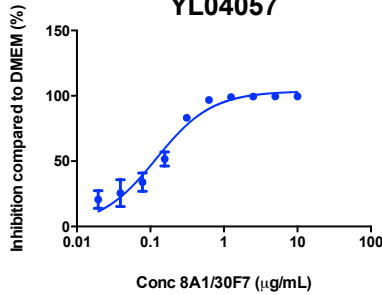

## Afg09

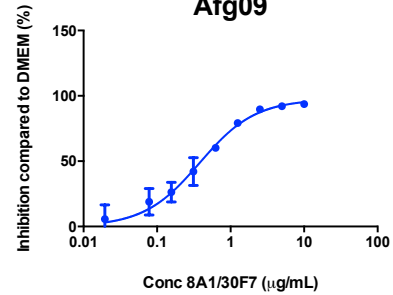

## NIV112143

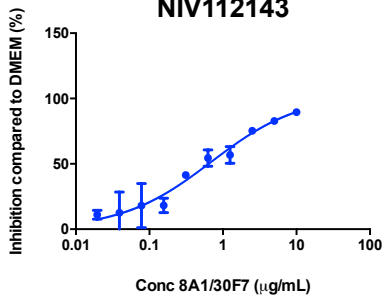

## Baghdad-12

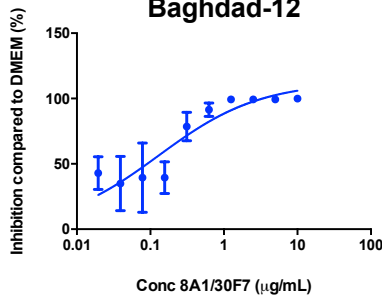

# 11E7/30F7

## IbAr10200

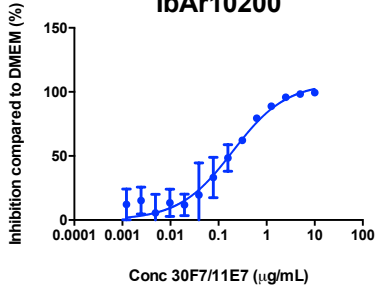

## Sudan Al-Fulah

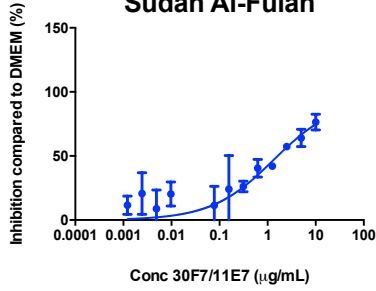

## Turkey

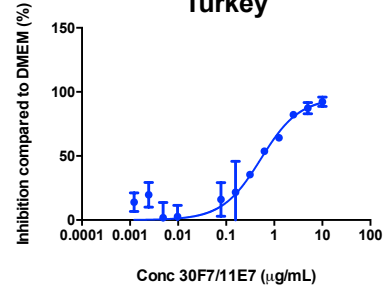

## Hoti

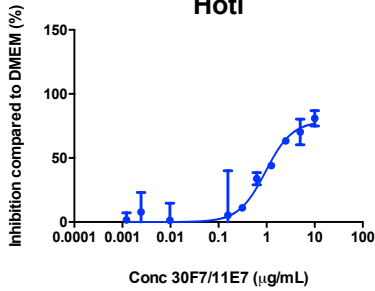

## Oman

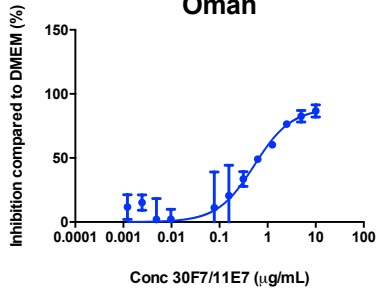

## SPU18/88

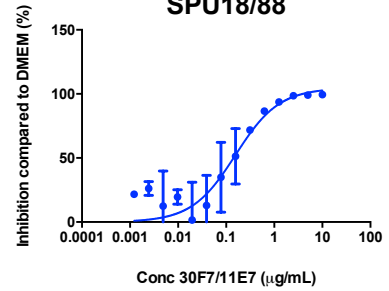

## ArD15786

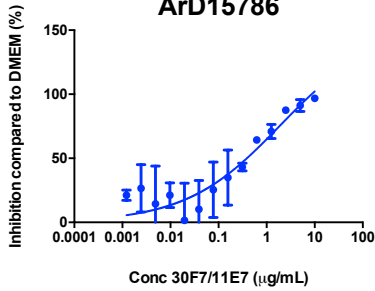

## YL04057

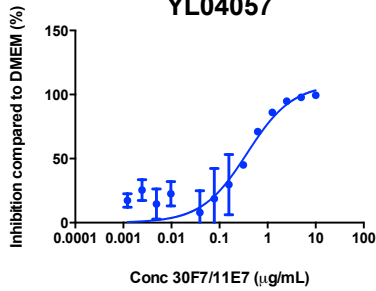

## Afg09

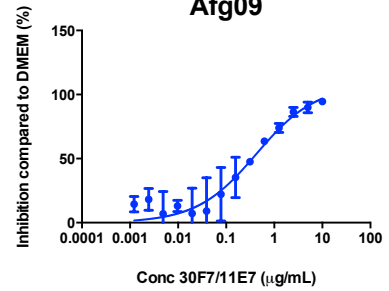

## NIV112143

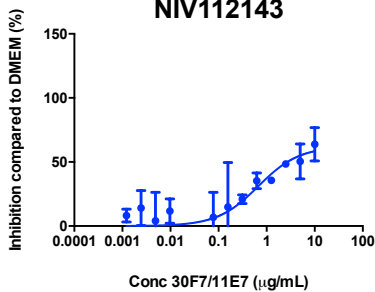

## Baghdad-12

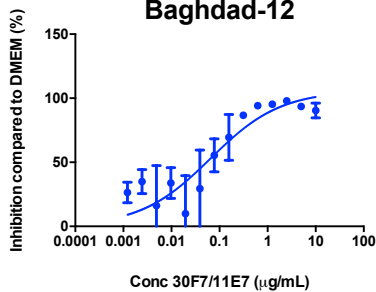

# 8A1/11E7/30F7

## IbAr10200

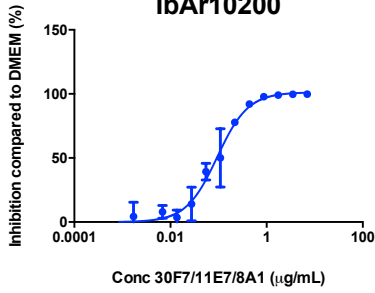

## Sudan Al-Fulah

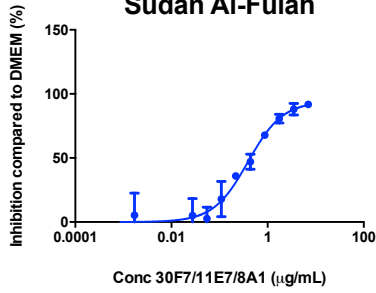

## Turkey

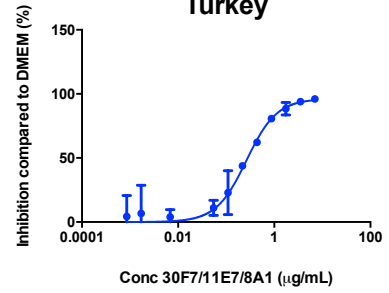

## Hoti

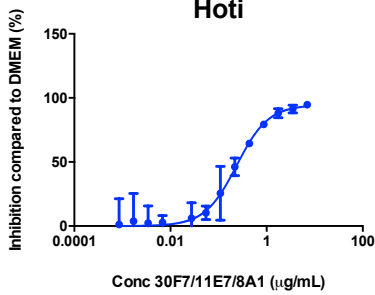

## Oman

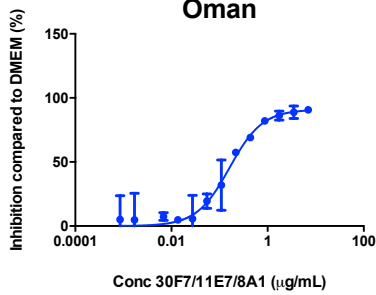

## SPU18/88

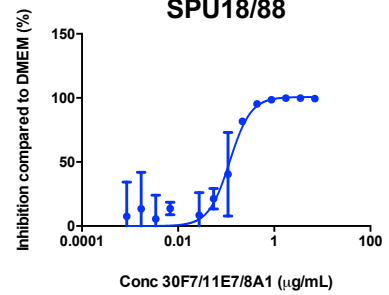

## ArD15786

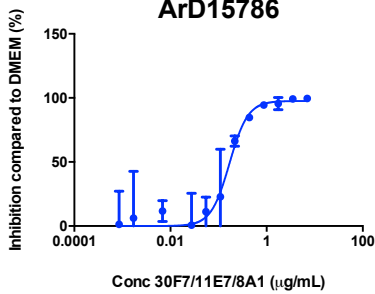

## YL04057

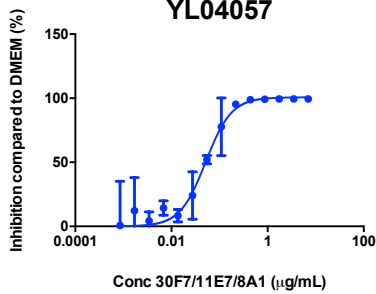

## Afg09

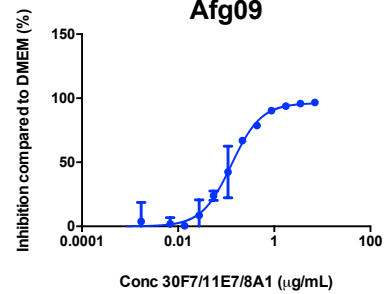

## NIV112143

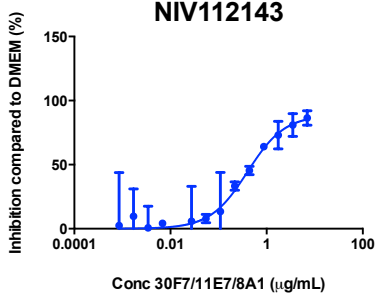

## Baghdad-12

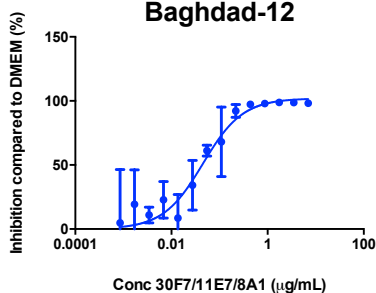

Supplement: NIHMS1068864-supplement-Supplemental_Fig__2.pdf [file NIHMS1068864-supplement-Supplemental_Fig__2.pdf]
